# Supplementary material for: Detection of circulating tumour DNA after neoadjuvant chemoradiotherapy in patients with locally advanced oesophageal cancer
Source: PubMed Central journal article supplement (PMC10092085; doi:10.1002/path.6016), 2022-10-31
Supplement: PATH-259-35-s001.pdf [file PATH-259-35-s001.pdf]

# Detection of circulating tumour DNA after neoadjuvant chemoradiotherapy in patients with locally advanced oesophageal cancer

BM Eyck *et al. J Pathol* <https://doi.org/10.1002/path.6016>

## Supplementary Figure S1

### Supplementary Tables S1–S2

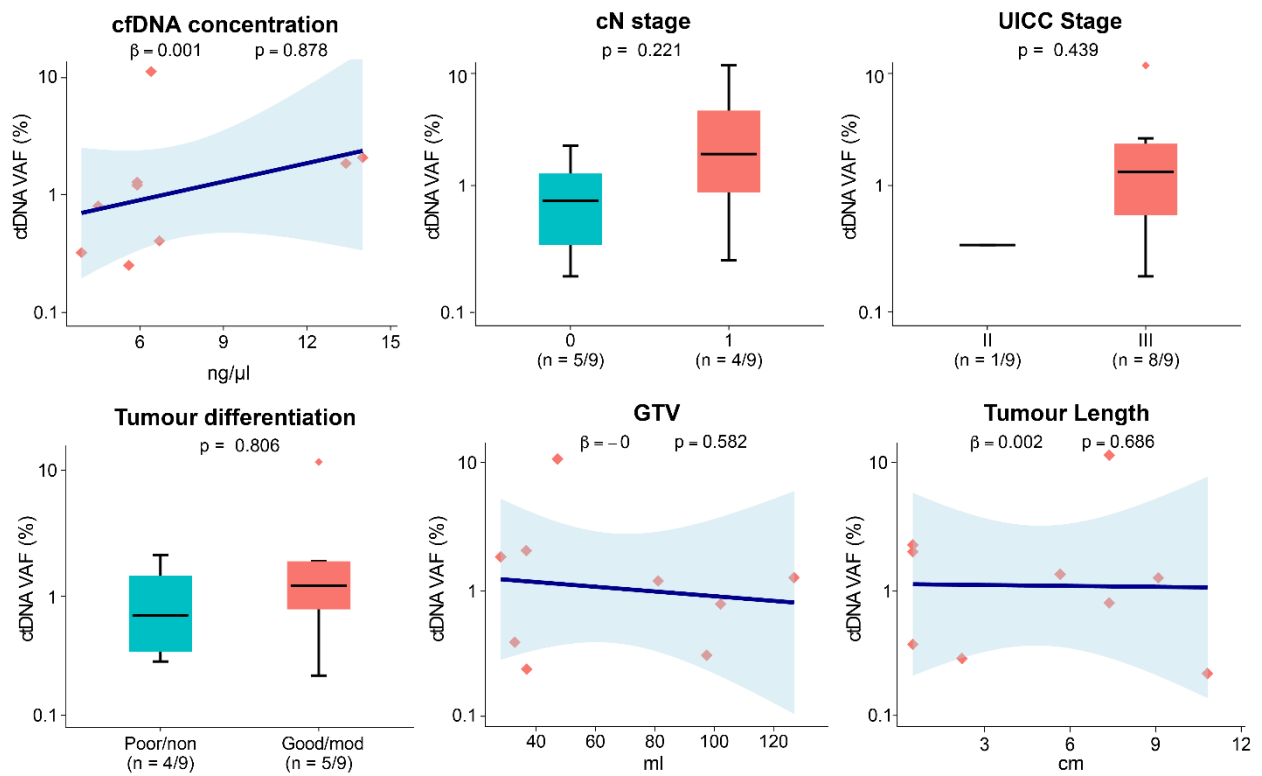

**Figure S1.** Correlation of baseline tumour characteristics with variant allele frequency (VAF) of nine pre-treatment ctDNA-positive patients. Patients for whom data were missing were excluded from the analysis. cN, clinical nodal; UICC, Union for International Cancer Control; GTV, gross tumour volume.

**Table S1.** Input information of the analysed tissue and plasma samples.

| Study ID | Tissue samples for NGS |                           |                     |                           | cfDNA samples for NGS-UMI |                |                | cfDNA samples for dPCR |                |                |
|----------|------------------------|---------------------------|---------------------|---------------------------|---------------------------|----------------|----------------|------------------------|----------------|----------------|
|          | t = 0 tumour biopsies  |                           | Resection specimens |                           | t = 0                     | t = 1          | t = 2          | t = 0                  | t = 1          | t = 2          |
|          | Tumour area (%)        | DNA concentration (ng/μl) | Tumour area (%)     | DNA concentration (ng/μl) | DNA input (ng)            | DNA input (ng) | DNA input (ng) | DNA input (ng)         | DNA input (ng) | DNA input (ng) |
| 1        | 60%                    | 1.57                      | NTR                 | –                         | 20.0                      | 21.0           | 21.0           | 25.7                   | 39.1           | 38.7           |
| 2        | 30%                    | 1.70                      | 70%                 | 1.85                      | 20.0                      | 15.0           | 10.0           | –                      | –              | –              |
| 3        | 90%                    | 1.06                      | NTR                 | –                         | 14.0                      | 20.0           | 21.0           | 1.1                    | 5.5            | 6.9            |
| 4        | 80%                    | 4.16                      | 60%                 | 1.03                      | 21.5                      | 20.0           | 14.0           | –                      | –              | –              |
| 5        | 50%                    | 3.98                      | NR                  | –                         | 3.8                       | 15.0           | 3.8            | 15.7                   | 18.9           | 29.5           |
| 6        | 50%                    | 1.70                      | 70%                 | 13.50                     | 3.8                       | 10.2           | 20.0           | –                      | –              | –              |
| 7        | 40%                    | 1.40                      | 40–50%              | 4.10                      | 4.0                       | 5.1            | –              | 9.6                    | 12.5           | –              |
| 8        | 60%                    | 7.10                      | 70–80%              | 15.30                     | 4.0                       | 18.2           | 5.0            | 8.4                    | 24.8           | 28.3           |
| 9        | 40%                    | 1.80                      | NR                  | –                         | 4.0                       | –              | –              | –                      | –              | –              |
| 10       | 70%                    | 10.80                     | 70%                 | 15.80                     | 4.0                       | 31.8           | –              | 9.3                    | 17.6           | –              |
| 11       | 60%                    | 5.50                      | 80%                 | 15.50                     | 4.0                       | 5.9            | –              | –                      | –              | –              |
| 12       | 70%                    | 16.10                     | NR                  | –                         | 4.0                       | 4.5            | N/A            | 19.0                   | 29.8           | 26.4           |
| 13       | 80%                    | 9.31                      | 90%                 | 17.60                     | –                         | –              | –              | –                      | –              | –              |
| 14       | 80%                    | 3.90                      | NR                  | –                         | –                         | –              | –              | –                      | –              | –              |
| 15       | 80%                    | 6.92                      | NR                  | –                         | 4.0                       | –              | –              | –                      | –              | –              |
| 16       | 60%                    | 12.10                     | NR                  | –                         | –                         | –              | –              | –                      | –              | –              |
| 17       | 50%                    | 4.02                      | 70%                 | 0.96                      | 20.0                      | 20.0           | –              | –                      | –              | –              |
| 18       | 60%                    | 7.31                      | NTR                 | –                         | –                         | –              | –              | 14.8                   | 5.9            | 4.8            |
| 19       | N/A                    | 2.79                      | NTR                 | –                         | 15.3                      | 23.0           | 21.0           | –                      | –              | –              |
| 20       | N/A                    | N/A                       | 80%                 | 5.34                      | N/A                       | 21.0           | –              | –                      | –              | –              |
| 21       | 60%                    | 20.70                     | NTR                 | –                         | –                         | –              | –              | –                      | –              | –              |
| 22       | 70%                    | 5.04                      | 80%                 | 6.91                      | –                         | –              | –              | –                      | –              | –              |
| 23       | 70%                    | 9.65                      | NTR                 | –                         | –                         | –              | –              | –                      | –              | –              |
| 24       | 50%                    | 0.76                      | 70%                 | 0.48                      | 20.7                      | 20.0           | 20.0           | 0.0                    | 3.5            | 21.3           |
| 25       | 70%                    | 2.89                      | 95%                 | 10.10                     | 20.8                      | 20.0           | 21.0           | 19.1                   | 20.2           | 2.9            |
| 26       | 70%                    | 1.15                      | 60%                 | 1.42                      | –                         | –              | –              | –                      | –              | –              |
| 27       | 70%                    | 0.91                      | 60%                 | 13.10                     | 15.4                      | 24.0           | –              | –                      | –              | –              |
| 28       | 80%                    | 4.05                      | 60%                 | 2.30                      | 4.0                       | 3.3            | 1.0            | 9.3                    | 13.0           | 14.9           |
| 29       | 70%                    | 12.30                     | 60%                 | 1.75                      | 3.9                       | 4.9            | –              | 6.6                    | 13.3           | –              |
| 30       | 80%                    | 5.90                      | NR                  | –                         | 3.9                       | –              | –              | 20.9                   | –              | –              |
| 31       | 70%                    | 7.10                      | NR                  | –                         | 3.9                       | 130.2          | N/A            | 13.3                   | 21.7           | N/A            |

NGS, next-generation sequencing; cfDNA, circulating cell-free DNA; NGS-UMI, next-generation sequencing with unique molecular identifiers; dPCR, digital polymerase chain reaction; NTR, no tumour residue in resection specimen; NR, no resection performed; ND, no data; N/A, not available.

**Table S2.** Mutations identified in baseline ( $t = 0$ ) tissue that were potentially detectable in circulating cell-free DNA (cfDNA) with corresponding findings in cfDNA at the baseline ( $t = 0$ ) and 6 weeks ( $t = 1$ ) and 12 weeks ( $t = 2$ ) after neoadjuvant chemoradiotherapy. Findings shown in bold were considered to be ctDNA-positive.

| ID | $t = 0$ tissue |                |              |         | cfDNA analysis | $t = 0$ cfDNA |            |              |             |            |               | $t = 1$ cfDNA |             |               |              |             |               | $t = 2$ cfDNA |           |              |             |            |              |
|----|----------------|----------------|--------------|---------|----------------|---------------|------------|--------------|-------------|------------|---------------|---------------|-------------|---------------|--------------|-------------|---------------|---------------|-----------|--------------|-------------|------------|--------------|
|    | NGS            |                |              |         |                | NGS-UMI       |            |              | dPCR        |            |               | NGS-UMI       |             |               | dPCR         |             |               | NGS-UMI       |           |              | dPCR        |            |              |
|    | Gene           | CDS mutation   | AA mutation  | VAF (%) |                | Mol cov       | Mut mol    | VAF (%)      | WT cop      | Mut cop    | VAF (%)       | Mol cov       | Mut mol     | VAF (%)       | WT cop       | Mut cop     | VAF (%)       | Mol cov       | Mut mol   | VAF (%)      | WT cop      | Mut cop    | VAF (%)      |
| 1  | TP53           | c.524G>A       | p.R175H      | 69.2%   | O/P            | 2968          | 1          | 0.03%        | 5558        | 0          | 0.00%         | 5091          | 2           | 0.04%         | 13980        | 0           | 0.00%         | 4433          | 0         | 0.00%        | 11922       | 0          | 0.00%        |
| 2  | TP53           | c.527G>T       | p.C176F      | 45.1%   | O              | 1248          | 0          | 0.00%        | –           | –          | –             | 2637          | 0           | 0.00%         | –            | –           | –             | 1391          | 0         | 0.00%        | –           | –          | –            |
| 3  | TP53           | c.742C>T       | p.R248W      | 41.9%   | O/P            | 1377          | 0          | 0.00%        | 1168        | 0          | 0.00%         | 2598          | 0           | 0.00%         | 3606         | 0           | 0.00%         | N/A           | N/A       | N/A          | 4340        | 0          | 0.00%        |
| 4  | TP53           | c.709_733dup   | p.G245Dfs*3  | 48.2%   | O              | 1563          | 0          | 0.00%        | –           | –          | –             | 3457          | 0           | 0.00%         | –            | –           | –             | 2532          | 0         | 0.00%        | –           | –          | –            |
| 5  | TP53           | c.455C>T       | p.P152L      | 64.1%   | O/P            | 1536          | 1          | 0.07%        | 2733        | 0          | 0.00%         | 2259          | 0           | 0.00%         | 0            | 0           | 0.00%         | 3362          | 2         | 0.06%        | 0           | 0          | 0.00%        |
| 6  | TP53           | c.659A>G       | p.Y220C      | 68.9%   | O              | 888           | 0          | 0.00%        | –           | –          | –             | 1513          | 0           | 0.00%         | –            | –           | –             | 1802          | 0         | 0.00%        | –           | –          | –            |
| 7  | AKT1           | c.49G>A        | p.E17K       | 55.3%   | O              | 1162          | 0          | 0.00%        | –           | –          | –             | 791           | 0           | 0.00%         | –            | –           | –             | –             | –         | –            | –           | –          | –            |
| 7  | TP53           | c.524G>A       | p.R175H      | 50.5%   | O/P            | 1314          | 0          | 0.00%        | 2654        | 0          | 0.00%         | 950           | 0           | 0.00%         | 1075         | 0           | 0.00%         | –             | –         | –            | –           | –          | –            |
| 8  | TP53           | c.818G>A       | p.R273H      | 54.3%   | O/P            | 1094          | 1          | 0.09%        | 1282        | 4          | 0.30%         | 1886          | 0           | 0.00%         | 4068         | 0           | 0.00%         | 568           | 0         | 0.00%        | 416         | 0          | 0.00%        |
| 9  | TP53           | c.637C>T       | p.R213*      | 51.3%   | O              | 696           | 0          | 0.00%        | –           | –          | –             | –             | –           | –             | –            | –           | –             | –             | –         | –            | –           | –          |              |
| 10 | TP53           | c.817C>T       | p.R273C      | 27.0%   | O/P            | 707           | 2          | 0.28%        | 2117        | 0          | 0.00%         | 569           | 0           | 0.00%         | 87           | 0           | 0.00%         | –             | –         | –            | –           | –          | –            |
| 11 | TP53           | c.764_766del   | p.I255del    | 58.1%   | O              | <b>1214</b>   | <b>3</b>   | <b>0.25%</b> | –           | –          | –             | <b>1574</b>   | <b>6</b>    | <b>0.38%</b>  | –            | –           | –             | –             | –         | –            | –           | –          | –            |
| 12 | TP53           | c.586C>T       | p.R196*      | 44.2%   | O/P            | 1032          | 2          | 0.19%        | <b>5113</b> | <b>16</b>  | <b>0.32%</b>  | 834           | 0           | 0.00%         | <b>7235</b>  | <b>20</b>   | <b>0.28%</b>  | <b>795</b>    | <b>43</b> | <b>5.41%</b> | <b>5135</b> | <b>300</b> | <b>5.51%</b> |
| 15 | APC            | c.4391_4394del | p.E1464Vfs*8 | 68.3%   | O              | <b>1728</b>   | <b>22</b>  | <b>1.27%</b> | –           | –          | –             | –             | –           | –             | –            | –           | –             | –             | –         | –            | –           | –          |              |
| 17 | TP53           | c.413C>T       | p.A138V      | 60.2%   | O              | 2663          | 0          | 0.00%        | –           | –          | –             | 3261          | 0           | 0.00%         | –            | –           | –             | –             | –         | –            | –           | –          | –            |
| 18 | TP53           | c.916C>T       | p.R306*      | 11.2%   | P              | –             | –          | –            | 5438        | 0          | 0.00%         | –             | –           | –             | 3800         | 4           | 0.10%         | –             | –         | –            | 4550        | 0          | 0.00%        |
| 19 | KRAS           | c.182A>T       | p.Q61L       | 23.7%   | O              | 1658          | 0          | 0.00%        | –           | –          | –             | 2313          | 0           | 0.00%         | –            | –           | –             | 1832          | 0         | 0.00%        | –           | –          | –            |
| 20 | TP53           | c.578A>C       | p.H193P      | 44.0%   | O              | 1080          | 0          | 0.00%        | –           | –          | –             | 2012          | 0           | 0.00%         | –            | –           | –             | –             | –         | –            | –           | –          | –            |
| 24 | TP53           | c.818G>A       | p.R273H      | 41.4%   | O/P            | <b>1710</b>   | <b>7</b>   | <b>0.40%</b> | N/A         | N/A        | N/A           | 2550          | 0           | 0.00%         | 1417         | 2           | 0.14%         | 2855          | 0         | 0.00%        | 762         | 0          | 0.00%        |
| 25 | TP53           | c.524G>A       | p.R175H      | 79.1%   | O/P            | <b>2016</b>   | <b>24</b>  | <b>1.20%</b> | <b>5273</b> | <b>27</b>  | <b>0.51%</b>  | 3579          | 0           | 0.00%         | 9733         | 0           | 0.00%         | 3442          | 0         | 0.00%        | 2296        | 0          | 0.00%        |
| 27 | TP53           | c.772G>A       | p.E258K      | 48.0%   | O              | 3259          | 0          | 0.00%        | –           | –          | –             | 3760          | 0           | 0.00%         | –            | –           | –             | –             | –         | –            | –           | –          | –            |
| 28 | TP53           | c.524G>A       | p.R175H      | 89.8%   | O/P            | <b>1435</b>   | <b>141</b> | <b>9.83%</b> | <b>2133</b> | <b>272</b> | <b>11.32%</b> | 722           | 0           | 0.00%         | 801          | 0           | 0.00%         | 673           | 0         | 0.00%        | 2425        | 0          | 0.00%        |
| 29 | TP53           | c.524G>A       | p.R175H      | 61.6%   | O/P            | <b>1149</b>   | <b>4</b>   | <b>0.35%</b> | <b>1260</b> | <b>10</b>  | <b>0.79%</b>  | 828           | 0           | 0.00%         | 3758         | 0           | 0.00%         | –             | –         | –            | –           | –          | –            |
| 30 | TP53           | c.733G>A       | p.G245S      | 57.5%   | O/P            | <b>4466</b>   | <b>70</b>  | <b>1.57%</b> | <b>5758</b> | <b>122</b> | <b>2.07%</b>  | –             | –           | –             | –            | –           | –             | –             | –         | –            | –           | –          | –            |
| 31 | TP53           | c.818G>A       | p.R273H      | 65.3%   | O/P            | <b>2764</b>   | <b>47</b>  | <b>1.70%</b> | <b>2397</b> | <b>45</b>  | <b>1.85%</b>  | <b>5408</b>   | <b>327</b>  | <b>6.05%</b>  | <b>6199</b>  | <b>386</b>  | <b>5.86%</b>  | –             | –         | –            | –           | –          | –            |
| 31 | ERBB2          | c.2524G>A      | p.V842I      | 36.2%   | O              | <b>3730</b>   | <b>21</b>  | <b>0.56%</b> | –           | –          | –             | <b>7153</b>   | <b>181</b>  | <b>2.53%</b>  | –            | –           | –             | –             | –         | –            | –           | –          | –            |
| 31 | KRAS           | c.34G>T        | p.G12C       | 19.9%   | O/P            | 3457          | 0          | 0.00%        | 4446        | 0          | 0.00%         | 12010         | 0           | 0.00%         | 18301        | 0           | 0.00%         | –             | –         | –            | –           | –          | –            |
| 31 | KRAS           | c.35G>T        | p.G12V       | 15.9%   | O/P            | <b>5212</b>   | <b>95</b>  | <b>2.75%</b> | <b>5673</b> | <b>96</b>  | <b>1.66%</b>  | <b>8393</b>   | <b>1258</b> | <b>14.99%</b> | <b>19384</b> | <b>2246</b> | <b>10.38%</b> | –             | –         | –            | –           | –          | –            |

NGS, next-generation sequencing; NGS-UMI, next-generation sequencing with unique molecular identifiers; dPCR, digital polymerase chain reaction; Resec spec, resection specimen; CDS, coding DNA sequence; AA, amino acid; VAF, variant allele frequency; Mol cov, molecular coverage; Mut mol, mutant molecules; WT cop, wild-type copies; Mut cop, mutant copies; O, OncoPrint NGS; P, digital PCR; N/A, not available.
